# Supplementary material for: Diversity and distribution of nuclease bacteriocins in bacterial genomes revealed using Hidden Markov Models
Source: PubMed Central journal article supplement (PMC5536347; doi:10.1371/journal.pcbi.1005652), 2017-07-17
Supplement: pcbi.1005652.s010.pdf [file pcbi.1005652.s010.pdf]

**Supplementary Table 1: HMM profiles used to identify the conserved motifs of NB cytotoxic domains and associated immunity proteins.**

| Pfam accession | Name             | Description                                  |
|----------------|------------------|----------------------------------------------|
|                | <i>DNase/IMM</i> |                                              |
| PF12629.2      | Colicin-DNase    | Cytotoxic domain of DNase colicins           |
| PF01320.13     | Colicin Pyocin   | Colicin DNase immunity protein               |
|                | <i>tRNase</i>    |                                              |
| PF11429.3      | Colicin D        | tRNase cytotoxic domain of Colicin D         |
| PF09204.5      | Colicin-immun    | Immunity protein for Colicin D like tRNases  |
| PF12106.3      | Colicin_C        | tRNase cytotoxic domain of Colicin E5        |
| PF11480.3      | ImmE5            | Immunity protein for Colicin E5 like tRNases |

|           |                |                                                 |
|-----------|----------------|-------------------------------------------------|
| PF09000.5 | Cytotoxic      | rRNases<br>cytotoxic<br>domain of<br>Colicin E3 |
| -         | ColE3_Immunity | Immunity<br>protein for<br>ColE3 like           |
|           |                | rRNases                                         |
| -         | Non-HNH DNase  | Cytotoxic<br>domain of<br>Pyocin S3             |
| -         | Non-HNH DNase  | Immunity<br>protein of<br>Pyocin S3             |
