# Supplementary material for: Diversity and distribution of nuclease bacteriocins in bacterial genomes revealed using Hidden Markov Models
Source: PubMed Central journal article supplement (PMC5536347; doi:10.1371/journal.pcbi.1005652), 2017-07-17
Supplement: pcbi.1005652.s011.pdf [file pcbi.1005652.s011.pdf]

|                                    |     |            |         |         |            |         |           |
|------------------------------------|-----|------------|---------|---------|------------|---------|-----------|
| <i>Yersinia bercovieri</i>         | 3   | 1 (33.3)   | 0 (0.0) | 0 (0.0) | 1 (33.3)   | 0 (0.0) | 0 (0.0)   |
| <i>Yersinia enterocolitica</i>     | 115 | 92 (80.0)  | 0 (0.0) | 0 (0.0) | 64 (55.7)  | 0 (0.0) | 28 (24.3) |
| <i>Yersinia frederiksenii</i>      | 14  | 2 (14.3)   | 0 (0.0) | 0 (0.0) | 2 (14.3)   | 0 (0.0) | 0 (0.0)   |
| <i>Yersinia intermedia</i>         | 14  | 4 (28.6)   | 0 (0.0) | 0 (0.0) | 4 (28.6)   | 0 (0.0) | 0 (0.0)   |
| <i>Yersinia kristensenii</i>       | 8   | 5 (62.5)   | 0 (0.0) | 0 (0.0) | 5 (62.5)   | 0 (0.0) | 0 (0.0)   |
| <i>Yersinia mollaretii</i>         | 11  | 11 (100.0) | 0 (0.0) | 0 (0.0) | 11 (100.0) | 0 (0.0) | 1 (9.1)   |
| <i>Yersinia pseudotuberculosis</i> | 44  | 25 (56.8)  | 0 (0.0) | 0 (0.0) | 25 (56.8)  | 0 (0.0) | 0 (0.0)   |
| <i>Yersinia sp.</i>                | 4   | 2 (50.0)   | 0 (0.0) | 0 (0.0) | 2 (50.0)   | 0 (0.0) | 0 (0.0)   |
