# Supplementary material for: Diversity and distribution of nuclease bacteriocins in bacterial genomes revealed using Hidden Markov Models
Source: PubMed Central journal article supplement (PMC5536347; doi:10.1371/journal.pcbi.1005652), 2017-07-17
Supplement: pcbi.1005652.s012.pdf [file pcbi.1005652.s012.pdf]

**Supplementary Table 3. HMM profiles used to identify the conserved regions of proteins in the Tol/Ton operons.**

| PFAM accession | Name      | Description                                          |
|----------------|-----------|------------------------------------------------------|
| PF03544.9      | TonB C    | C-terminal region of TonB. Interacts with TonB box.  |
| PF01618.11     | MotA ExbB | MotA/TolQ/ExbB proton channel family                 |
| PF02472.11     | ExbD      | Biopolymer transport protein<br>ExbD/TolR/MotB       |
| PF07676.7      | PD40      | WD40-like Beta Propeller Repeat associated with TolB |
